# Supplementary material for: Different-Level Simultaneous Minimization Scheme for Fault Tolerance of Redundant Manipulator Aided with Discrete-Time Recurrent Neural Network
Source: PubMed Central journal article supplement (PMC5601992; doi:10.3389/fnbot.2017.00050), 2017-09-11
Supplement: Presentation1.pdf [file Presentation1.pdf]

APPENDIX A

DYNAMIC MODELING OF PLANAR ROBOT MANIPULATOR

For the dynamic modeling of the six-link planar robot manipulator presented in [1], it is known from [2], [3] that the dynamic equation of the robot manipulator can be given as

$$\tau = H\ddot{\theta} + c_\tau(\dot{\theta}, \theta) + g_\tau(\theta), \quad (1)$$

where  $\theta$ ,  $\dot{\theta}$ ,  $\ddot{\theta}$  and  $\tau$  denote the  $n$ -dimensional joint-angle, joint-velocity, joint-acceleration and joint-torque vectors, respectively;  $H$  denotes the  $n \times n$  dimensional inertia matrix;  $c_\tau$  denotes the  $n$ -dimensional Coriolis/centrifugal force vector and  $g_\tau$  denotes the  $n$ -dimensional gravitational force vector. By defining

$$H = \begin{bmatrix} H_{11} & H_{12} & H_{13} & H_{14} & H_{15} & H_{16} \\ H_{21} & H_{22} & H_{23} & H_{24} & H_{25} & H_{26} \\ H_{31} & H_{32} & H_{33} & H_{34} & H_{35} & H_{36} \\ H_{41} & H_{42} & H_{43} & H_{44} & H_{45} & H_{46} \\ H_{51} & H_{52} & H_{53} & H_{54} & H_{55} & H_{56} \\ H_{61} & H_{62} & H_{63} & H_{64} & H_{65} & H_{66} \end{bmatrix},$$

$$c_\tau = [c_{\tau 1} \quad c_{\tau 2} \quad c_{\tau 3} \quad c_{\tau 4} \quad c_{\tau 5} \quad c_{\tau 6}]^T,$$

$$g_\tau = [g_{\tau 1} \quad g_{\tau 2} \quad g_{\tau 3} \quad g_{\tau 4} \quad g_{\tau 5} \quad g_{\tau 6}]^T,$$

and by using the recursive Newton-Euler algorithm [2], [3], the detailed expressions of elements of matrix  $H$  as well as vectors  $c_\tau$  and  $g_\tau$  are derived and presented as below.

$$\begin{aligned} H_{11} &= H_{21} + (\sum_{i=1}^6 m_i)l_1(l_1) + (\sum_{i=2}^6 m_i)l_1l_2c_2 + (\sum_{i=3}^6 m_i)l_1l_3c_{23} + (\sum_{i=4}^6 m_i)l_1l_4c_{234} + (m_5 + m_6)l_1l_5c_{2345} + m_6l_1l_6c_{23456}, \\ H_{12} &= H_{22} + (\sum_{i=2}^6 m_i)l_1l_2c_2 + (\sum_{i=3}^6 m_i)l_1l_3c_{23} + (\sum_{i=4}^6 m_i)l_1l_4c_{234} + (m_5 + m_6)l_1l_5c_{2345} + m_6l_1l_6c_{23456}, \\ H_{13} &= H_{23} + (\sum_{i=3}^6 m_i)l_1l_3c_{23} + (\sum_{i=4}^6 m_i)l_1l_4c_{234} + (m_5 + m_6)l_1l_5c_{2345} + m_6l_1l_6c_{23456}, \\ H_{14} &= H_{24} + (\sum_{i=4}^6 m_i)l_1l_4c_{234} + (m_5 + m_6)l_1l_5c_{2345} + m_6l_1l_6c_{23456}, \\ H_{15} &= H_{25} + (m_5 + m_6)l_1l_5c_{2345} + m_6l_1l_6c_{23456}, \\ H_{16} &= H_{26} + m_6l_1l_6c_{23456}, \\ c_{\tau 1} &= c_{\tau 2} - (\sum_{i=2}^6 m_i)l_1l_2a_2s_2 - (\sum_{i=3}^6 m_i)l_1l_3a_3s_{23} - (\sum_{i=4}^6 m_i)l_1l_4a_4s_{234} - (m_5 + m_6)l_1l_5a_5s_{2345} + m_6l_1l_6a_6s_{23456}, \\ g_{\tau 1} &= g_{\tau 2} + (\sum_{i=1}^6 m_i)l_1gc_1; \\ H_{21} &= H_{31} + (\sum_{i=2}^6 m_i)l_2(l_1c_2 + l_2) + (\sum_{i=3}^6 m_i)l_2l_3c_3 + (\sum_{i=4}^6 m_i)l_2l_4c_{34} + (m_5 + m_6)l_2l_5c_{345} + m_6l_2l_6c_{3456}, \\ H_{22} &= H_{32} + (\sum_{i=2}^6 m_i)l_2(l_2) + (\sum_{i=3}^6 m_i)l_2l_3c_3 + (\sum_{i=4}^6 m_i)l_2l_4c_{34} + (m_5 + m_6)l_2l_5c_{345} + m_6l_2l_6c_{3456}, \\ H_{23} &= H_{33} + (\sum_{i=3}^6 m_i)l_2l_3c_3 + (\sum_{i=4}^6 m_i)l_2l_4c_{34} + (m_5 + m_6)l_2l_5c_{345} + m_6l_2l_6c_{3456}, \\ H_{24} &= H_{34} + (\sum_{i=4}^6 m_i)l_2l_4c_{34} + (m_5 + m_6)l_2l_5c_{345} + m_6l_2l_6c_{3456}, \\ H_{25} &= H_{35} + (m_5 + m_6)l_2l_5c_{345} + m_6l_2l_6c_{3456}, \\ H_{26} &= H_{36} + m_6l_2l_6c_{3456}, \\ c_{\tau 2} &= c_{\tau 3} + (\sum_{i=2}^6 m_i)l_2(l_1a_1s_2) - (\sum_{i=3}^6 m_i)l_2l_3a_3s_3 - (\sum_{i=4}^6 m_i)l_2l_4a_4s_{34} - (m_5 + m_6)l_2l_5a_5s_{345} + m_6l_2l_6a_6s_{3456}, \\ g_{\tau 2} &= g_{\tau 3} + (\sum_{i=2}^6 m_i)l_2gc_{12}; \\ H_{31} &= H_{41} + (\sum_{i=3}^6 m_i)l_3(l_1c_{23} + l_2c_3 + l_3) + (\sum_{i=4}^6 m_i)l_3l_4c_4 + (m_5 + m_6)l_3l_5c_{45} + m_6l_3l_6c_{456}, \\ H_{32} &= H_{42} + (\sum_{i=3}^6 m_i)l_3(l_2c_3 + l_3) + (\sum_{i=4}^6 m_i)l_3l_4c_4 + (m_5 + m_6)l_3l_5c_{45} + m_6l_3l_6c_{456}, \\ H_{33} &= H_{43} + (\sum_{i=3}^6 m_i)l_3(l_3) + (\sum_{i=4}^6 m_i)l_3l_4c_4 + (m_5 + m_6)l_3l_5c_{45} + m_6l_3l_6c_{456}, \\ H_{34} &= H_{44} + (\sum_{i=4}^6 m_i)l_3l_4c_4 + (m_5 + m_6)l_3l_5c_{45} + m_6l_3l_6c_{456}, \\ H_{35} &= H_{45} + (m_5 + m_6)l_3l_5c_{45} + m_6l_3l_6c_{456}, \\ H_{36} &= H_{46} + m_6l_3l_6c_{456}, \\ c_{\tau 3} &= c_{\tau 4} + (\sum_{i=3}^6 m_i)l_3(l_1a_1s_{23} + l_2a_2s_3) - (\sum_{i=4}^6 m_i)l_3l_4a_4s_{34} - (m_5 + m_6)l_3l_5a_5s_{345} + m_6l_3l_6a_6s_{3456}, \\ g_{\tau 3} &= g_{\tau 4} + (\sum_{i=3}^6 m_i)l_3gc_{123}; \\ H_{41} &= H_{51} + (m_4 + m_5 + m_6)l_4(l_1c_{234} + l_2c_{34} + l_3c_4 + l_4) + (m_5 + m_6)l_4l_5c_5 + m_6l_4l_6c_{56}, \\ H_{42} &= H_{52} + (m_4 + m_5 + m_6)l_4(l_2c_{34} + l_3c_4 + l_4) + (m_5 + m_6)l_4l_5c_5 + m_6l_4l_6c_{56}, \\ H_{43} &= H_{53} + (m_4 + m_5 + m_6)l_4(l_3c_4 + l_4) + (m_5 + m_6)l_4l_5c_5 + m_6l_4l_6c_{56}, \\ H_{44} &= H_{54} + (m_4 + m_5 + m_6)l_4(l_4) + (m_5 + m_6)l_4l_5c_5 + m_6l_4l_6c_{56}, \\ H_{45} &= H_{55} + (m_5 + m_6)l_4l_5c_5 + m_6l_4l_6c_{56}, \\ H_{46} &= H_{56} + m_6l_4l_6c_{56}, \\ c_{\tau 4} &= c_{\tau 5} + (m_4 + m_5 + m_6)l_4(l_1a_1s_{234} + l_2a_2s_{34} + l_3a_3s_4) - (m_5 + m_6)l_4l_5a_5s_5 + m_6l_4l_6a_6s_{56}, \\ g_{\tau 4} &= g_{\tau 5} + (m_4 + m_5 + m_6)l_4gc_{1234}; \\ H_{51} &= H_{61} + (m_5 + m_6)l_5(l_1c_{2345} + l_2c_{345} + l_3c_{45} + l_4c_5 + l_5) + m_6l_5l_6c_6, \\ H_{52} &= H_{62} + (m_5 + m_6)l_5(l_2c_{345} + l_3c_{45} + l_4c_5 + l_5) + m_6l_5l_6c_6, \\ H_{53} &= H_{63} + (m_5 + m_6)l_5(l_3c_{45} + l_4c_5 + l_5) + m_6l_5l_6c_6, \\ H_{54} &= H_{64} + (m_5 + m_6)l_5(l_4c_5 + l_5) + m_6l_5l_6c_6, \\ H_{55} &= H_{65} + (m_5 + m_6)l_5(l_5) + m_6l_5l_6c_6, \\ H_{56} &= H_{66} + m_6l_5l_6c_6, \\ c_{\tau 5} &= c_{\tau 6} + (m_5 + m_6)l_5(l_1a_1s_{2345} + l_2a_2s_{345} + l_3a_3s_{45} + l_4a_4s_5) - m_5l_5l_6a_6s_6, \\ g_{\tau 5} &= g_{\tau 6} + (m_5 + m_6)l_5gc_{12345}; \\ H_{61} &= m_6l_6(l_1c_{23456} + l_2c_{3456} + l_3c_{456} + l_4c_{56} + l_5c_6 + l_6), \\ H_{62} &= m_6l_6(l_2c_{3456} + l_3c_{456} + l_4c_{56} + l_5c_6 + l_6), \\ H_{63} &= m_6l_6(l_3c_{456} + l_4c_{56} + l_5c_6 + l_6), \\ H_{64} &= m_6l_6(l_4c_{56} + l_5c_6 + l_6), \\ H_{65} &= m_6l_6(l_5c_6 + l_6), \\ H_{66} &= m_6l_6(l_6), \\ c_{\tau 6} &= m_6l_6(l_6)(l_1a_1s_{23456} + l_2a_2s_{3456} + l_3a_3s_{456} + l_4a_4s_{56} + l_5a_5s_6), \\ g_{\tau 6} &= m_6l_6gc_{123456}; \end{aligned}$$

in which,  $m_i$  denotes the mass of the  $i$ th link of the manipulator;  $l_i$  denotes the length of the  $i$ th link; and  $a_i = (\sum_{j=1}^i \theta_j)^2$  and  $b_i = \sum_{j=1}^i \theta_j$ , with  $i = 1, 2, \dots, 6$ . Besides,  $g$  denotes the gravitational acceleration. Additionally,  $c_i = \cos(\theta_i)$ ,  $s_i = \sin(\theta_i)$ ,  $c_{ijk\dots} = \cos(\theta_i + \theta_j + \theta_k + \theta_{\dots})$  and  $s_{ijk\dots} = \sin(\theta_i + \theta_j + \theta_k + \theta_{\dots})$ . Specifically speaking, for the manipulator used in this paper,  $m_1 = 7.887$  kg,  $m_2 = 5.730$  kg,  $m_3 = 3.198$  kg,  $m_4 = 3.020$  kg,  $m_5 = 2.773$  kg,  $m_6 = 0.337$  kg,  $l_1 = 0.301$  m,  $l_2 = 0.290$  m,  $l_3 = 0.230$  m,  $l_4 = 0.225$  m,  $l_5 = 0.214$  m and  $l_6 = 0.103$  m.

REFERENCES

- [1] Y. Zhang and Z. Zhang, *Repetitive Motion Planning and Control of Redundant Robot Manipulators*. New York: Springer-Verlag, 2013.
- [2] J. J. Craig, *Introduction to Robotics: Mechanics and Control*. New Jersey, USA: Pearson Education, 2008.
- [3] S. K. Saha, *Introduction to Robotics*. Noida, UP, India: Tata McGraw-Hill Education, 2008.
